# Supplementary material for: CDK9 inhibitor FIT-039 prevents replication of multiple DNA viruses
Source: JCI journal article supplement (doi:10.1172/jci73805), 2014-07-07
Supplement: sd1 [file 1]

**SUPPLEMENTARY INFORMATION**

**Novel CDK9 Inhibitor Prevents Replication of Broad DNA Viruses**

Makoto Yamamoto,<sup>1,2,3</sup> Hiroshi Onogi,<sup>2</sup> Isao Kii,<sup>3</sup> Suguru Yoshida,<sup>4</sup> Kei Iida,<sup>3</sup> Hiroyuki Sakai,<sup>5</sup> Minako Abe,<sup>6</sup> Toshiaki Tsubota,<sup>3</sup> Nobutoshi Ito,<sup>6</sup> Takamitsu Hosoya,<sup>4</sup> & Masatoshi Hagiwara<sup>3\*</sup>

\*e-mail: hagiwara.masatoshi.8c@kyoto-u.ac.jp

<sup>1</sup>Department of Developmental and Regenerative Biology, Medical Research Institute, Tokyo Medical and Dental University, Yushima 1-5-45, Bunkyo-ku, Tokyo 113-8510 (Japan)

<sup>2</sup>KinoPharma. Inc., 2-8-9 Sangenjaya, Setagaya-ku, Tokyo 154-0024 (Japan)

<sup>3</sup>Department of Anatomy and Developmental Biology, Graduate School of Medicine, Kyoto University, Yoshida-Konoe-cho, Sakyo-ku Kyoto, 606-8501 (Japan)

<sup>4</sup>Laboratory of Chemical Bioscience, Institute of Biomaterials and Bioengineering,

- 1 Tokyo Medical and Dental University, 2-3-10 Kanda-Surugadai, Tokyo 101-0062  
2 (Japan)
- 3 <sup>5</sup>Department of Viral Oncology, Institute for Virus Research Kyoto University, 53  
4 Shogoin Kawara-cho, Sakyo-ku, Kyoto 606-8507 (Japan)
- 5 <sup>6</sup>Laboratory of Structural Biology, Medical Research Institute, Tokyo Medical and  
6 Dental University, Yushima 1-5-45, Bunkyo-ku, Tokyo 113-8510 (Japan)
- 7
- 8 **Supplementary Results:** Supplementary Figures and legends: 1-9
- 9 **Supplementary Tables:** Supplementary Table and legends 1-7
- 10 **Supplementary Notes and References:** Synthesis and Methods
- 11

## Supplementary Results

### Supplementary Figure 1

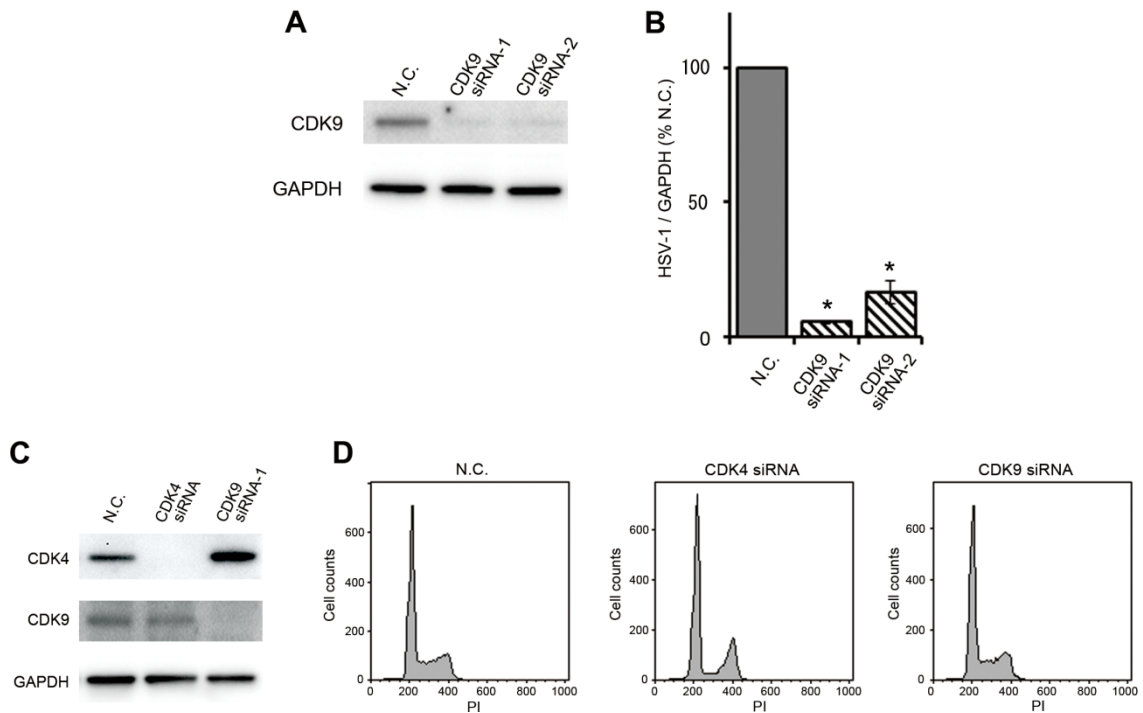

### Knockdown of CDK9 suppressed the replication of HSV-1.

(A) Knockdown of CDK9 by siRNA-1 and -2 (see Methods) in HeLa cells. Total cell lysates were subjected to Western blotting with antibodies against CDK9 and GAPDH. (B) Replication of HSV-1 was suppressed in CDK9-knockdown HeLa cells. The genomic DNA of HSV-1 replication was analyzed by real-time PCR. Scramble oligo was used as a negative control (N.C.). Each point represents the average  $\pm$  standard deviation of the results from three experiments performed in duplicate. Asterisks indicate significant differences (\*  $P < 0.0001$ ) versus N.C. as determined by the Student's t test (B). (C) Knockdown of CDK4 or CDK9 in HeLa cells by siRNAs. Total cell lysates were subjected to Western blotting with antibodies against CDK4, CDK9, and GAPDH. (D) Knockdown of CDK9 did not affect the cell cycle, compared to that of CDK4. Cells were stained with propidium iodide and analyzed by flow cytometry.

# 1    **Supplementary Figure 2**

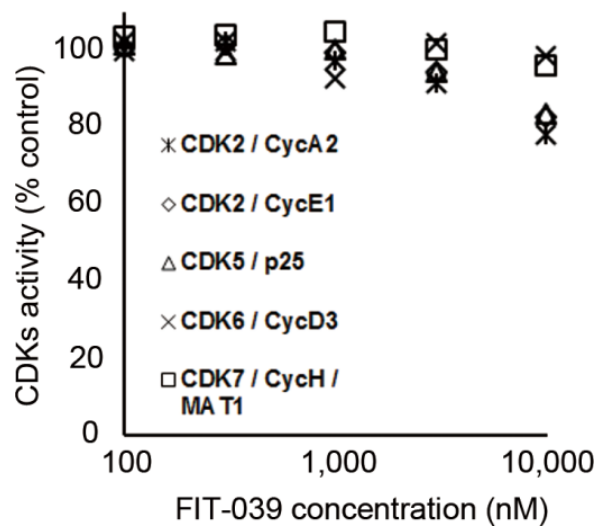

## 2    ***In vitro* kinase assay of other CDKs**

3    An increased amount of FIT-039 did not inhibit CDK2/cyclinA2, CDK2/cyclinE1,  
 4    CDK5/p25, CDK6/cyclinD3, and CDK7/cyclin/MAT1.

5

1 **Supplementary Figure 3**

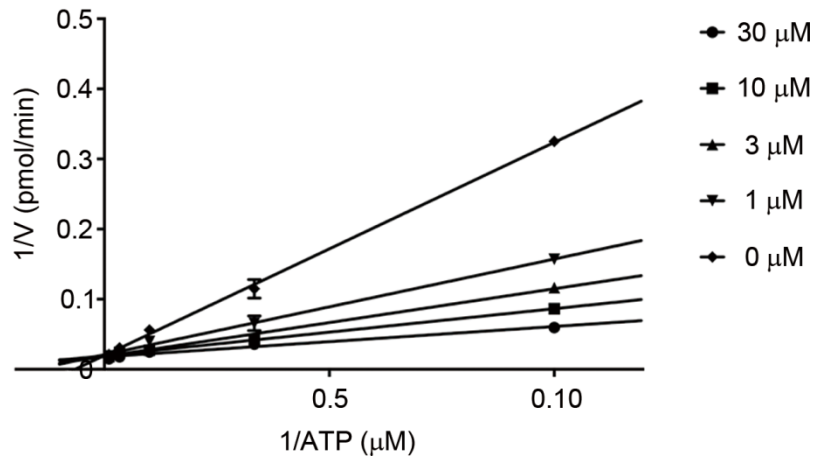

2 **Double-reciprocal plots of FIT-039 against CDK9/CycT1**

3 Double-reciprocal plots showing the competitive inhibition of ATP by FIT-039.  
 4 CDK9/CycT1 activity was measured at the indicated concentration of FIT-039 and ATP.  
 5 Reciprocal velocity was plotted *versus*  $1/[ATP]$ .  $K_m = 36.85 \mu M$ ,  $V_{max} = 5.78 \text{ pmol/min}$ ,  
 6 and  $K_i = 5.23 \mu M$ .

7

8

1     **Supplementary Figure 4**

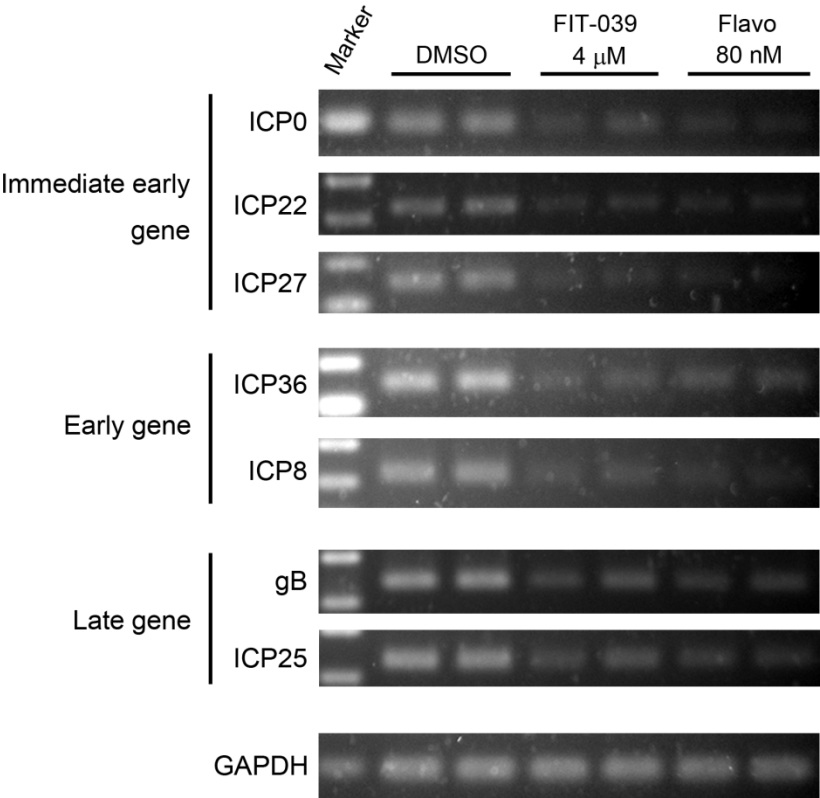

2     **FIT-039 and flavopiridol inhibited the transcription of HSV-1 genes**

3     FIT-039 and flavopiridol suppressed the transcription of the HSV-1 immediate-early  
4     genes (ICP0, ICP22, and ICP27), early genes (ICP36 and ICP8), and late gene (gB and  
5     ICP25). Attachment of HSV-1 to HeLa cells was allowed at 4 °C for 15 minutes, and the  
6     cells were then incubated at 37 °C for 24 hours with the indicated compounds. The cells  
7     were subjected to RT-PCR. Flavo: Flavopiridol.

8

## Supplementary Figure 5

**A**

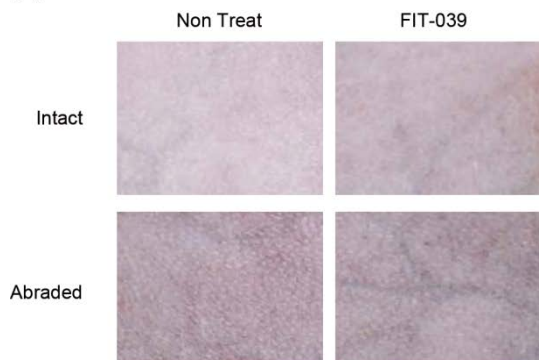

**B**

| Rabbit No. | Reaction | 27 hours |         | 72 hours |         |
|------------|----------|----------|---------|----------|---------|
|            |          | Intact   | Abraded | Intact   | Abraded |
| 1          | Erythema | 0        | 0       | 0        | 0       |
|            | Edema    | 0        | 0       | 0        | 0       |
| 2          | Erythema | 0        | 0       | 0        | 0       |
|            | Edema    | 0        | 0       | 0        | 0       |
| 3          | Erythema | 0        | 0       | 0        | 0       |
|            | Edema    | 0        | 0       | 0        | 0       |
| Mean       |          | 0.0      | 0.0     | 0.0      | 0.0     |
| P.I.I.     |          | 0.00     |         |          |         |

### Skin irritation test in rabbits

(A, B) The backs of rabbits were clipped and epidermal abrasions were performed with a sterile needle at one test site, while the opposite site remained intact. A total of 0.5 g of FIT-039 was then applied to each site, which was then covered with a non-reactive cloth. Three rabbits were subjected to each experimental group. The test sites were examined for dermal reactions 27 and 72 hours after the test article application (A) in accordance with the FHSA-recommended Draize scoring criteria. The Primary Irritation Index (P.I.I.) of FIT-039 was calculated to be 0.00; No irritation was observed on the skins of rabbits (B).

## Supplementary Figure 6

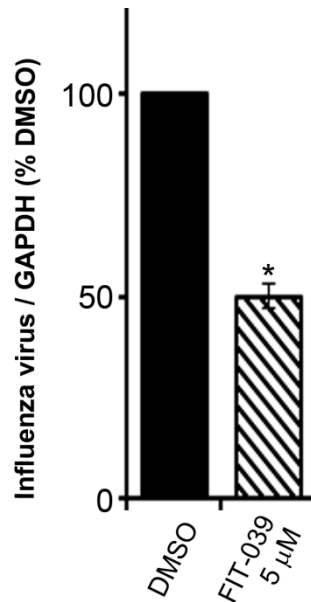

### FIT-039 suppressed the replication of influenza virus H1N1

MDCK cells were infected with influenza virus H1N1 PR8 strain and treated with 5 μM FIT-039 for 48 hrs. Influenza virus H1N1 replication was analyzed by real-time PCR at 5 μM of FIT-039. Each bar represents the average  $\pm$  standard deviation of the results from three experiments performed in duplicate. Asterisks indicate significant differences (\*  $P < 0.005$ ) versus the DMSO treatment as determined by the Student's *t* test.

1 **Supplementary Figure 7**

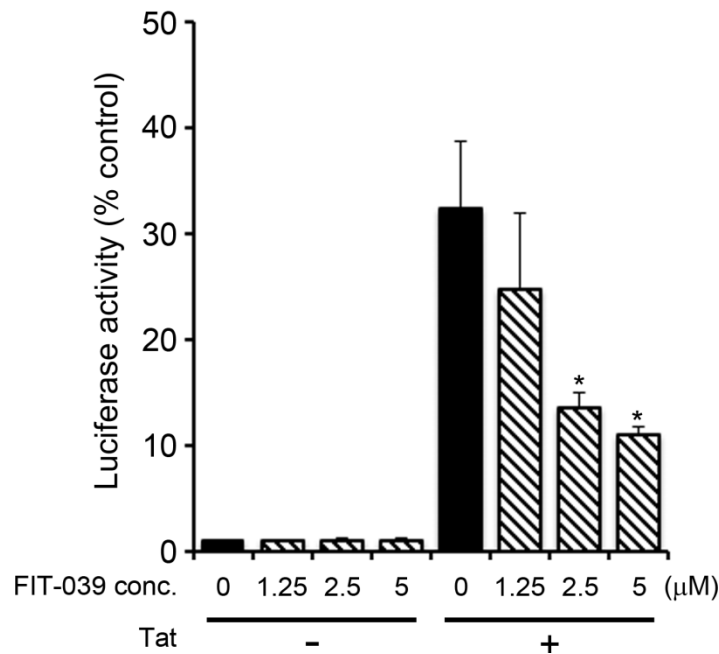

2 **FIT-039 inhibited HIV-TAT induced transcription in a dose-dependent manner.**

3 CV1 cells were co-transfected with hRL-tk, LTR-Luc, EGFP-C1, herring sperm DNA  
 4 and 3μg CMV4-Tat or CMV4-(no insert). hRL-tk (Promega) as an internal control.  
 5 Medium was changed to each compound medium at the indicated concentrations 24 hr  
 6 after transfection. These cells were harvested 48 hr post-treatment. Luciferase and  
 7 renilla luciferase activity were measured by Luciferase Assay System (Promega). Each  
 8 bar represents the average  $\pm$  standard deviation of the results from three experiments  
 9 performed in duplicate. Asterisks indicate significant differences (\*  $P < 0.005$ ) versus  
 10 the DMSO treatment as determined by the Student's t test.

## Supplementary Figure 8

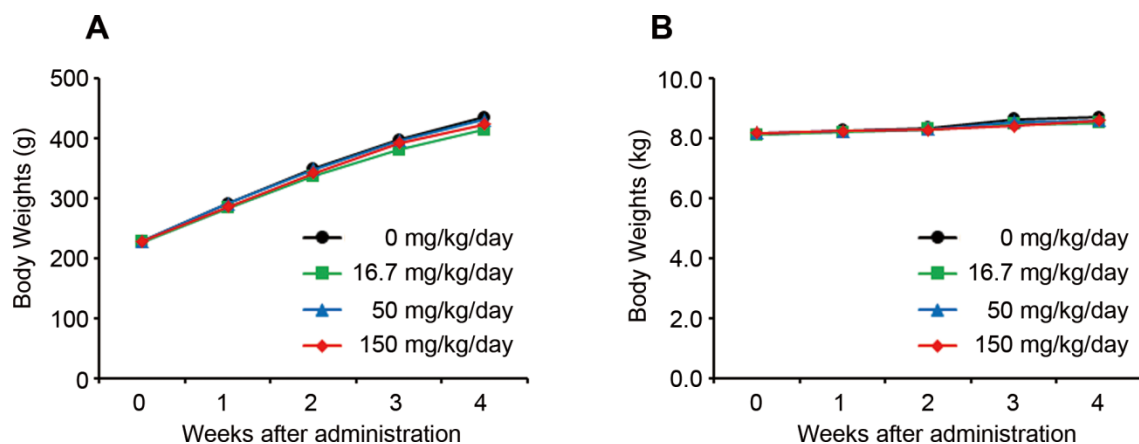

### Four weeks repeated-dose oral toxicity studies in rats and dogs.

FIT-039 (16.7, 50 or 150 mg/kg) or the solvent (0.5% methylcellulose) were orally administrated to male rats or dogs once a day for 28 days. Body weights and general conditions were determined for 28 days from the first administration. Rats body weights (A), dogs body weights (B).

1 **Supplementary Figure 9**

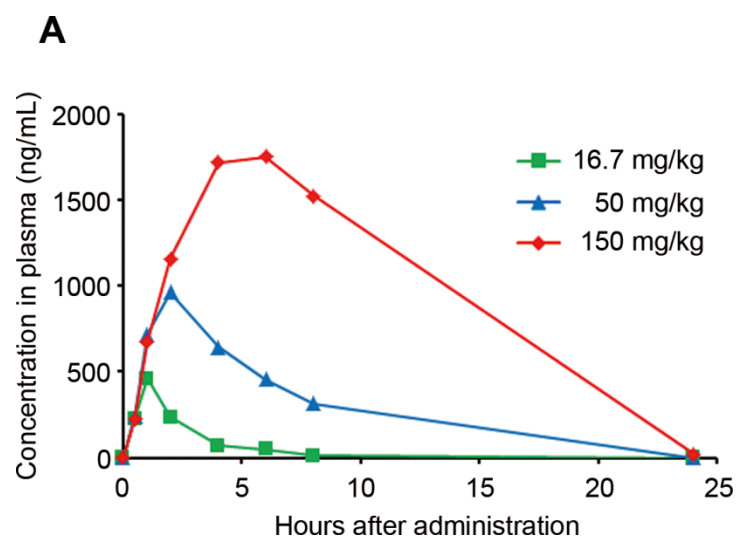

2 **Oral absorbability of FIT-039 in rats.**

3 FIT-039 (16.7, 50 or 150 mg/kg) were orally administrated to male rats. Oral  
4 absorbability was determined at 0, 0.5, 1, 2, 4, 6, 8 and 24 hrs from the first  
5 administration by LC/MS/MS.

6

7

1 **Supplementary Tables**

2 **Supplementary Table 1**

| Kinase                | % Inhibition | Kinase          | % Inhibition | Kinase                 | % Inhibition | Kinase                 | % Inhibition |
|-----------------------|--------------|-----------------|--------------|------------------------|--------------|------------------------|--------------|
| Abl                   | -2.0         | EphA3           | 1.0          | MAPKAP-K2              | -6.0         | PKC $\epsilon$         | 25.0         |
| Abl (E255K)           | -5.6         | EphA4           | 2.0          | MAPKAP-K3              | 3.0          | PKC $\zeta$            | -4.0         |
| Abl (H396P)           | 10.0         | EphA5           | 9.0          | MARK1                  | 2.0          | PKC $\eta$             | 33.0         |
| Abl (M351T)           | -1.0         | EphA6           | 2.4          | MARK2                  | 2.9          | PKC $\theta$           | 18.0         |
| Abl (Q252H)           | -1.0         | EphA7           | 27.0         | MARK3                  | 3.2          | PKC $\iota$            | 3.0          |
| Abl (T315I)           | -29.0        | EphA8           | 1.0          | MARK4                  | 3.1          | PKD1                   | 0.0          |
| Abl (Y253F)           | 1.0          | EphB1           | 17.0         | MEK1                   | -5.0         | PKD2                   | -10.0        |
| ACK1                  | 5.0          | EphB2           | 14.0         | MELK                   | 39.0         | PKD3                   | 3.8          |
| ALK                   | 39.0         | EphB3           | 9.0          | Mer                    | 25.0         | PKG1 $\alpha$          | 44.0         |
| ALK4                  | 23.0         | EphB4           | 11.0         | Met                    | 6.0          | PKG1 $\beta$           | 41.0         |
| AMPK                  | 10.0         | ErbB4           | -8.0         | MET(Y1235D)            | 11.3         | PKN1                   | 77.4         |
| AMPK $\alpha$ 2/b1/g1 | 3.7          | Erk1            | -2.1         | MGC42105               | 6.9          | PKR                    | -1.7         |
| Arg                   | 2.0          | Erk5            | 4.7          | MINK                   | 8.0          | PLK1                   | 17.9         |
| ARK5                  | 11.0         | FAK             | 27.0         | MKK6                   | -1.0         | Plk3                   | 5.0          |
| ASK1                  | 0.0          | Fer             | 32.0         | MKK7 $\beta$           | -26.0        | PLK4                   | 4.2          |
| AurA/TPX2             | -3.0         | Fes             | 23.0         | MLCK                   | 13.0         | PRAK                   | 28.0         |
| AurC                  | 0.8          | FGFR1           | -8.0         | MLK1                   | 16.0         | PRK2                   | 17.0         |
| Aurora-A              | 1.0          | FGFR1 (V561M)   | 2.0          | MLK2                   | 8.8          | PrkX                   | 12.0         |
| Axl                   | 6.0          | FGFR2           | 4.0          | MLK3                   | 5.9          | PTK5                   | 11.0         |
| BMPR1A                | 1.1          | FGFR2 (N549H)   | -3.0         | MNK1                   | 6.2          | Pyk2                   | 11.0         |
| Bmx                   | -12.0        | FGFR3           | -11.0        | Mnk2                   | 15.0         | QIK                    | -3.3         |
| BRAF                  | 6.5          | FGFR3 (K650E)   | 2.6          | MOS                    | 6.7          | Ret                    | -4.0         |
| BRK                   | 12.0         | FGFR3 (K650M)   | 0.6          | MRCK $\alpha$          | 2.0          | Ret (V804L)            | 11.0         |
| BRSK1                 | 3.2          | FGFR4           | -15.0        | MRCK $\beta$           | 1.0          | RET (M918T)            | 0.3          |
| BRSK2                 | 2.0          | Fgr             | 24.0         | MSK1                   | 63.0         | Ret (V804M)            | 6.0          |
| BTk                   | 2.0          | Flt1            | 9.0          | MSK2                   | 49.0         | RIPK2                  | 20.0         |
| BTk (R28H)            | 3.0          | Flt3            | 63.0         | MSSK1                  | 13.0         | ROCK-1                 | 6.0          |
| CaMKI                 | -5.0         | Flt3 (D835Y)    | 66.0         | MST1                   | 9.0          | ROCK-II                | 16.0         |
| CaMKII $\beta$        | 40.0         | Flt4            | 26.0         | MST2                   | 13.0         | Ron                    | 4.0          |
| CaMKII $\gamma$       | 30.0         | Fms             | 6.0          | MST3                   | 2.0          | Ros                    | 22.0         |
| CaMKII $\delta$       | 30.0         | FRK             | 1.3          | MST4                   | 5.1          | Rse                    | -32.0        |
| CaMKIV                | 4.0          | Fyn             | 1.0          | MuSK                   | 17.0         | Rsk1                   | 12.0         |
| CaMKI $\delta$        | -4.0         | GCK             | 4.0          | NDR1                   | -0.1         | Rsk2                   | 5.0          |
| CDC7                  | 2.5          | GRK5            | 2.0          | NEK1                   | -4.3         | Rsk3                   | 39.0         |
| CDK3/cyclinE          | 12.0         | GRK6            | 3.0          | NEK11                  | 30.0         | Rsk4                   | -26.0        |
| CDK4                  | 1.8          | GRK7            | -1.0         | NEK2                   | -55.0        | SAPK2 $\alpha$         | 1.0          |
| CGK2                  | 37.3         | GSK3 $\alpha$   | 74.9         | NEK3                   | 6.0          | SAPK2 $\alpha$ (T106M) | -4.0         |
| CHK1                  | -3.0         | GSK3 $\beta$    | 79.0         | NEK4                   | -0.5         | SAPK2 $\beta$          | 0.0          |
| CHK2                  | 6.0          | Haspin          | 77.0         | NEK6                   | -1.0         | SAPK3                  | -10.0        |
| CHK2 (I157T)          | 6.0          | Hck             | 14.0         | NEK7                   | -1.0         | SAPK4                  | -7.0         |
| CHK2 (R145W)          | 0.0          | HER2            | -12.6        | NEK9                   | 1.0          | SGK                    | 3.0          |
| CK1 $\alpha$          | -3.5         | HER4            | -1.0         | NLK                    | 30.0         | SGK2                   | -1.0         |
| CK1 $\epsilon$        | -1.2         | HGK             | 13.2         | NuaK1                  | 7.2          | SGK3                   | 4.0          |
| CK1 $\gamma$ 1        | 1.0          | HIPK1           | 2.0          | p70S6K                 | 77.0         | SIK                    | 4.0          |
| CK1 $\gamma$ 2        | 3.0          | HIPK2           | 4.0          | p70S6Kb                | 48.7         | SLK                    | 1.6          |
| CK1 $\gamma$ 3        | 8.0          | HIPK3           | 6.0          | PAK1                   | 0.7          | Snk                    | 8.0          |
| CK1 $\delta$          | -10.0        | HIPK4           | 35.1         | PAK2                   | 13.0         | SPHK1                  | -7.7         |
| CK2                   | 2.0          | IGF-1R          | 17.0         | PAK3                   | 50.0         | Src (1-530)            | 3.0          |
| CK2 $\alpha$ 1/b      | 0.0          | IKKe            | -5.2         | PAK4                   | 8.0          | Src (T341M)            | 11.0         |
| CK2 $\alpha$ 2        | -11.0        | IKK $\alpha$    | -28.0        | PAK5                   | 0.0          | SRM                    | -17.4        |
| cKit                  | 5.0          | IKK $\beta$     | -4.0         | PAK6                   | -7.0         | SRPK1                  | 6.0          |
| cKit (D816H)          | 7.0          | IR              | 17.0         | PAR-1Ba                | 13.0         | SRPK2                  | -1.0         |
| cKit (D816V)          | 0.0          | IRAK1           | 28.0         | PASK                   | 15.0         | STK33                  | 14.0         |
| cKit (V560G)          | -1.0         | IRAK4           | 4.0          | PBK                    | 9.0          | Syk                    | 6.0          |
| cKit (V654A)          | 0.0          | IRR             | 74.0         | PDGFR $\alpha$ (T674I) | 9.4          | TAK1                   | -13.0        |
| CLK2                  | 34.8         | ITK             | -2.2         | PDGFR $\alpha$         | -7.0         | TAK1-TAB1              | 7.1          |
| CLK3                  | 18.0         | Itk             | 10.0         | PDGFR $\alpha$ (D842V) | 12.0         | TAO1                   | -2.0         |
| COT                   | 7.0          | JAK2            | -5.0         | PDGFR $\alpha$ (V561D) | 36.0         | TAO2                   | 1.0          |
| c-RAF                 | 5.0          | JAK3            | 0.0          | PDGFR $\beta$          | -2.0         | TAO3                   | 14.0         |
| CRIK                  | 3.5          | JNK1 $\alpha$ 1 | 0.0          | PDHK2                  | 11.5         | TBK1                   | 9.0          |
| CSK                   | 20.0         | JNK2 $\alpha$ 2 | 3.0          | PDHK4                  | -0.5         | TEC                    | 1.6          |
| cSRC                  | -6.0         | JNK3            | 1.0          | PDK1                   | -8.0         | Tie2                   | -8.0         |
| CTK                   | 2.1          | KDR             | 1.0          | PEK                    | -1.3         | Tie2 (R849W)           | 12.0         |
| DAPK1                 | 4.0          | KIT (T670I)     | 4.3          | PGK                    | 10.8         | Tie2 (Y897S)           | 15.0         |
| DAPK2                 | 17.0         | Lck             | 18.0         | PHKG1                  | 2.1          | TLK2                   | -7.0         |
| DCAMK12               | -4.0         | LIMK1           | 12.0         | PHKG2                  | 4.9          | TNK1                   | 3.2          |
| DDR1                  | 7.2          | LKB1            | -3.0         | Phk $\gamma$ 2         | -1.0         | TtkA                   | 38.0         |
| DDR2                  | 18.0         | LOK             | 34.0         | PIK3CA/PIK3R1          | 1.6          | TtkB                   | 41.0         |
| DLK                   | -1.4         | LTK             | 6.8          | Pim-1                  | 64.0         | TRKC                   | 13.7         |
| DMPK                  | -1.0         | Lyn             | -1.0         | Pim-2                  | 43.0         | TSSK1                  | 6.0          |
| DRAK1                 | -16.0        | LYNb            | 1.7          | Pim-3                  | 27.0         | TSSK2                  | 5.0          |
| DYRK1B                | 74.9         | MAP2K2          | 4.9          | PKA                    | 28.0         | TTK                    | -16.1        |
| DYRK2                 | 46.0         | MAP2K3          | 7.3          | PKBa                   | 8.0          | Tsk                    | 12.0         |
| DYRK3                 | 72.1         | MAP2K4          | 10.0         | PKB $\beta$            | 4.0          | TYK2                   | 1.2          |
| eEF-2K                | 13.0         | MAP2K5          | 7.9          | PKB $\gamma$           | 7.0          | ULK3                   | -7.0         |
| EGFR                  | -4.0         | MAP2K6          | 5.6          | PKC $\mu$              | 12.0         | VRK2                   | 3.0          |
| EGFR (L858R)          | 4.0          | MAP2K7          | 10.8         | PKC $\delta$ 1         | 5.7          | WEE1                   | -2.7         |
| EGFR (L861Q)          | 3.0          | MAP3K1          | 6.4          | PKC $\delta$ 2         | -7.1         | WNK1                   | 0.8          |
| EGFR (T790M)          | 14.0         | MAP3K2          | 4.2          | PKC $\alpha$           | 21.0         | WNK2                   | 22.0         |
| EGFR (T790M, L858R)   | 4.0          | MAP3K3          | 8.4          | PKC $\beta$ 1          | 15.0         | WNK3                   | 13.0         |
| EML4-ALK              | 2.6          | MAP3K4          | -3.8         | PKC $\beta$ II         | 13.0         | Yes                    | -4.0         |
| EphA1                 | 30.0         | MAPK1           | 24.0         | PKC $\gamma$           | 19.0         | ZAP-70                 | -1.0         |
| EphA2                 | 12.0         | MAPK2           | -17.0        | PKC $\delta$           | 9.0          | ZIPK                   | -6.0         |

3

4 **Large panel of kinase screening of FIT-039**

5 Kinase inhibitory activity of FIT-039 (10  $\mu$ M) against kinome were screened by Merck  
6 Millipore's KinaseProfiler service (Merck Millipore) and Profiling Srevices  
7 (Carmabiosciences).

## Supplementary Table 2

| Item          | Dose (mg/kg/day, 14 days) |              | Item                        | Dose (mg/kg/day, 14 days) |              |
|---------------|---------------------------|--------------|-----------------------------|---------------------------|--------------|
|               | 0                         | 1000         |                             | 0                         | 1000         |
| AST (U/L)     | 78.8 ± 4.5                | 72.0 ± 5.7   | WBC (x 10 <sup>2</sup> /μL) | 106.0 ± 7.1               | 124.5 ± 4.9  |
| ALT (U/L)     | 36.0 ± 4.2                | 34.0 ± 11.3  | RBC (x 10 <sup>4</sup> /mL) | 618.5 ± 12.0              | 663.0 ± 91.9 |
| γGTP (U/L)    | ND                        | ND           | Hb (g/dL)                   | 13.7 ± 0.2                | 13.0 ± 0.0   |
| T-BIL (mg/dL) | 0.04 ± 0.01               | 0.03 ± 0.00  | HT (%)                      | 41.6 ± 0.3                | 41.7 ± 1.8   |
| CRE (mg/dL)   | 0.21 ± 0.02               | 0.20 ± 0.01  | MCV (fL)                    | 67.5 ± 2.1                | 63.5 ± 6.4   |
| BUN (mg/dL)   | 14.6 ± 0.1                | 15.8 ± 1.4   | MCH (pg)                    | 22.5 ± 0.7                | 20.0 ± 2.8   |
| GLU (mg/dL)   | 187.6 ± 7.6               | 182.0 ± 22.6 | MCHC (%)                    | 33.0 ± 0.0                | 31.0 ± 1.4   |
| TP (g/dL)     | 5.6 ± 0.4                 | 6.4 ± 0.1    | PLT (x 10 <sup>4</sup> /mL) | 98.7 ± 8.3                | 123.9 ± 11.0 |
| ALB (g/dL)    | 4.1 ± 0.3                 | 4.4 ± 0.2    |                             |                           |              |
| Ca (mEq/L)    | 10.7 ± 0.6                | 11.0 ± 0.4   |                             |                           |              |
| Na (mEq/L)    | 141.4 ± 0.6               | 141.5 ± 3.5  |                             |                           |              |
| K (mEq/L)     | 5.0 ± 0.3                 | 5.1 ± 0.7    |                             |                           |              |
| Cl (mEq/L)    | 102.0 ± 1.5               | 101.0 ± 1.4  |                             |                           |              |

## Hematology tests in the 2-week repeated-dose oral toxicity study in rats

Hematology tests were performed on day 28 in the 2-week repeated-dose oral toxicity study (Fig. 3G). No significant difference was observed in any testing item between FIT-039 and the solvent.

1 **Supplementary Table 3: Knockout phenotypes of target kinases of FIT-039**

| Kinase | Inhibitory effect (%) | Phenotypes                                                                                                                                              | Reference |
|--------|-----------------------|---------------------------------------------------------------------------------------------------------------------------------------------------------|-----------|
| GSK3b  | 79.0                  | embryonic lethal                                                                                                                                        | (1)       |
| PKN1   | 77.4                  | autoantibody production<br>glomerulonephritis                                                                                                           | (2)       |
| Haspin | 77.0                  | not reported                                                                                                                                            |           |
| p70s6k | 77.0                  | growth retardation                                                                                                                                      | (3)       |
| DYRK1B | 74.9                  | no abnormal phenotype detected                                                                                                                          | (4)       |
| GSK3a  | 74.9                  | decreased percent body fat<br>increased lean body mass<br>improved glucose tolerance<br>increased liver glucogen level<br>increased insulin sensitivity | (5)       |
| IRR    | 74.0                  | no abnormal phenotype detected                                                                                                                          | (6)       |
| DYRK3  | 72.1                  | no abnormal phenotype detected                                                                                                                          | (7)       |

2

1 **Supplementary Table 4**

|                     | Dose<br>( $\mu\text{g}/\text{plate}$ ) | Base - pair substitution type |        |          | Frameshift type |        |
|---------------------|----------------------------------------|-------------------------------|--------|----------|-----------------|--------|
|                     |                                        | TA100                         | TA1535 | WP2 uvrA | TA98            | TA1537 |
| S9 mix<br>(+)       | 0                                      | 143                           | 14     | 27       | 28              | 11     |
|                     | 313                                    | 123                           | 17     | 26       | 24              | 10     |
|                     | 625                                    | 116                           | 12     | 24       | 26              | 7      |
|                     | 1250                                   | 124                           | 13     | 28       | 24              | 7      |
|                     | 2500                                   | 124                           | 17     | 23       | 25              | 11     |
|                     | 5000                                   | 116                           | 12     | 22       | 23              | 6      |
|                     |                                        |                               |        |          |                 |        |
| Positive<br>control | Chemical                               | AF-2                          | SA     | AF-2     | AF-2            | 9AA    |
|                     | Dose ( $\mu\text{g}/\text{plate}$ )    | 0.01                          | 0.5    | 0.01     | 0.1             | 80     |
|                     | Number of colonies/plate               | 462                           | 456    | 98       | 503             | 358    |
| S9 mix<br>(-)       | 0                                      | 116                           | 12     | 33       | 40              | 17     |
|                     | 313                                    | 134                           | 11     | 40       | 40              | 10     |
|                     | 625                                    | 130                           | 12     | 33       | 35              | 10     |
|                     | 1250                                   | 130                           | 15     | 39       | 39              | 9      |
|                     | 2500                                   | 135                           | 12     | 36       | 32              | 9      |
|                     | 5000                                   | 156                           | 9      | 37       | 32              | 11     |
|                     |                                        |                               |        |          |                 |        |
| Positive<br>control | Chemical                               | 2AA                           | 2AA    | 2AA      | 2AA             | 2AA    |
|                     | Dose ( $\mu\text{g}/\text{plate}$ )    | 1                             | 2      | 10       | 0.5             | 2      |
|                     | Number of colonies/plate               | 1027                          | 364    | 739      | 401             | 292    |

2 **Mutagenicity test in bacteria (Ames test)**

3 Bacterium Salmonella strains and Escherichia coli strain were pre-incubated with  
4 FIT-039 or positive control compounds with or without S9mix. These mixtures were  
5 spread on agar plates and incubated for 48 hours. The number of colonies were counted,  
6 and mutagenicity was assessed. No increases in mutated colony counts were recognized  
7 in any strain, regardless of the presence or absence of the S9mix. These results indicate  
8 that FIT-039 did not cause any chromosomal aberrations.

9

## Supplementary Table 5

| Item      | Dose (mg/kg/day) |              |              |
|-----------|------------------|--------------|--------------|
|           | 0                | 500          | 2000         |
| PCE (%)   | 48.90 ± 1.83     | 49.50 ± 1.20 | 49.37 ± 2.37 |
| MNPCE (%) | 0.02 ± 0.03      | 0.04 ± 0.04  | 0.05 ± 0.06  |

### Mutagenicity test in mice (Micronucleus test)

FIT-039 (500 or 2000 mg/kg) or the solvent (polyethyleneglycol #400) were orally administrated to male CD1 mice once a day for 2 days. Six mice were assigned to each experimental group. Their bone marrow cells were collected at the femur 24 hours after the final administration, and the emergence of micronucleated polychromatic erythrocytes (MNPCE) and ratio of polychromatic erythrocytes in erythrocytes (PCE%) were examined. No significant differences were observed in the percentages of PCE or MNPCE between the FIT-039 or the solvent. These results indicate that FIT-039 does not exhibit any genotoxicity or bone marrow cell toxicity.

1 **Supplementary Table 6: Quantitative PCR primer sequences**

2

| RNA      | Sequence                      |                               |                                      |
|----------|-------------------------------|-------------------------------|--------------------------------------|
|          | Forward Primer                | Reverse Primer                | Probe                                |
| HSV-1    | 5' CGCATCAAGACCACCTCCTC 3'    | 5' GCTCGCACCACGCGA 3'         | 5' TGGCAACGCGGCCCAAC 3'              |
| HSV-2    | 5' CGCATCAAGACCACCTCCTC 3'    | 5' GCTCGCACCACGCGA 3'         | 5' CGGCGATGCGCCCCAG 3'               |
| HAdV-5   | 5' GACATGACTTTTGAGGTGGA 3'    | 5' TCGATGATGCCGCGGTG 3'       | 5' CCCATGGAYGAGCCCACCCT 3'           |
| HAdV-19  | 5' GCCGAGAAGGGCGTGCGCAGGTA 3' | 5' TACGCCAACTCCGCCACGCGCT 3'  |                                      |
| Infuenza | 5' GGACTGCAGCGTAGACGCTT 3     | 5' CATCCTGTTGTATATGAGGCCCAT 3 | 5' CTCAGTTATTCTGCTGGTGCACTTGCCA 3    |
| GAPDH    | 5' CTCCCCACACATGCACTTA 3'     | 5' CCTAGTCCCAGGGCTTTGATT 3'   | 5' AAAAGAGCTAGGAAGGACAGGCAACTTGGC 3' |

3

1 **Supplementary Table 7: RT- PCR primer sequences**

| RNA         | Sequence                   |                                |
|-------------|----------------------------|--------------------------------|
|             | Forward Primer             | Reverse Primer                 |
| HSV-1 ICP0  | 5' ATACACATGGCCCCTTTGAC 3' | 5' GTCCCTGTGTGTTTGTGTG 3'      |
| HSV-1 ICP22 | 5' CAGCCTTGGAGTCTGAGGTC 3' | 5' GTGGGGGAATGTCGTCATAA 3'     |
| HSV-1 ICP27 | 5' GGCGACTGACATTGATATGC 3' | 5' GGGTCTTCCATGTCCTCGT 3'      |
| HSV-1 ICP36 | 5' TACCCGAGCCGATGACTTAC 3' | 5' AAGGCATGCCCATTGTTATC 3'     |
| HSV-1 ICP8  | 5' AGCTCGTCCGTGTACGTCTT 3' | 5' CCCTCGGTAACGACCAGATA 3'     |
| HSV-1 gB    | 5' GGACACGAAACCGAAGAAGA 3' | 5' ATGCCCTCCGTGTAGTTCTG 3'     |
| HSV-1 ICP25 | 5' CTCGATACCTGGAACGAGGA 3' | 5' CGTGAAGAAACGAGAGAGC 3'      |
| HAdV-5 E1A  | 5' TACGGGGGACCCAGATATTA 3' | 5' CAGGCTCAGGTTCAGACACA 3'     |
| GAPDH       | 5' ACGGATTTGGTCGTATTGGG 3' | 5' GTAGTTGAGGTCAATGAAGGGGTC 3' |

2

3

## **Supplementary Notes**

### **Synthesis FIT-039, FIA-348, FIA-002, FIT-047, and FIA-017**

#### **Synthesis of small chemicals**

All chemical reagents used were commercial grade and were used as received.

Amides (FIT-039, FIA-348, FIA-002, FIT-047, and FIA-017) were prepared from the

corresponding amines as described previously (H. Onogi, M. Hagiwara, T. Hosoya, M.

Yamamoto, Y. Nonaka, T. Hiramatsu, Aniline derivative having anti-DNA virus activity,

WO 2009/020198). Analytical thin-layer chromatography (TLC) was performed on

precoated (0.25 mm) silica gel plates (Merck Chemicals, Silica Gel 60 F<sub>254</sub>, Cat. No.

1.05715). Column chromatography was conducted using silica gel (Kanto Chemical Co.,

Inc., Silica Gel 60N, spherical neutral, particle size 40–50  $\mu\text{m}$ , Cat. No. 37563-85 or

particle size 63–210  $\mu\text{m}$ , Cat. No. 37565-85). Melting points (Mp) were measured with

a Opti Melt MPA100 (Stanford Research Systems) and were uncorrected.  $^1\text{H}$  spectra

were obtained with a Bruker AVANCE 400 spectrometer or Bruker AVANCE 500

spectrometer at 400 or 500 MHz, respectively.  $^{13}\text{C}$  NMR spectra were obtained with a

Bruker AVANCE 500 spectrometer at 126 MHz.  $^{19}\text{F}$  NMR spectrum was obtained with

a Bruker AVANCE 400 spectrometer at 376 MHz.  $\text{CDCl}_3$  (Acros Organics, Cat. No. 368651000) was used as a solvent to obtain NMR spectra. Chemical shifts ( $\delta$ ) were given in parts per million (ppm) downfield from  $(\text{CH}_3)_4\text{Si}$  ( $\delta$  0.00 for  $^1\text{H}$  NMR in  $\text{CDCl}_3$ ) as an internal reference, or  $\alpha,\alpha,\alpha$ -trifluorotoluene ( $\delta$  63.0 ppm for  $^{19}\text{F}$  NMR in  $\text{CDCl}_3$ ) as an external standard with coupling constants ( $J$ ) in hertz (Hz). The abbreviations s, d, t, q, m, and br signify singlet, doublet, triplet, quartet, multiplet, and broad, respectively. IR spectra were measured by diffuse reflectance method on a Shimadzu IRPrestige-21 spectrometer attached to a DRS-8000A with absorption bands given in  $\text{cm}^{-1}$ . High-resolution mass spectra (HRMS) were measured on a Bruker micrOTOF mass spectrometer under positive electrospray ionization ( $\text{ESI}^+$ ) conditions at Institute of Biomaterials and Bioengineering, Tokyo Medical and Dental University.

***N*-[5-Fluoro-2-(1-piperidinyl)phenyl]isonicotinthioamide (FIT-039)**

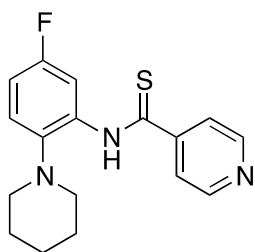

Mp 181–184 °C (decomp.); TLC  $R_f$  0.49 (*n*-hexane/dichloromethane/ethyl acetate = 3/5/2);  $^1\text{H}$  NMR ( $\text{CDCl}_3$ , 400 MHz)  $\delta$  1.58–1.76 (m, 6H, 3CH<sub>2</sub>), 2.83 (t, 4H,  $J$  = 5.0 Hz,

1 2CH<sub>2</sub>), 6.95 (ddd, 1H, *J* = 2.8, 8.0, 8.0 Hz, aromatic), 7.24 (dd, 1H, *J* = 5.6, 8.0 Hz,  
2 aromatic), 7.70–7.74 (AA'BB', 2H, aromatic), 8.74–8.78 (AA'BB', 2H, aromatic), 9.28  
3 (dd, 1H, *J* = 2.8, 10.8 Hz, aromatic), 11.13 (s, 1H, NH); <sup>13</sup>C NMR (CDCl<sub>3</sub>, 126 MHz) δ  
4 23.7 (1C), 27.0 (2C), 54.3 (2C), 107.0 (d, 1C, *J*<sup>2</sup><sub>C-F</sub> = 29.9 Hz), 112.7 (d, 1C, *J*<sup>2</sup><sub>C-F</sub> =  
5 22.8 Hz), 120.2 (2C), 122.2 (d, 1C, *J*<sup>3</sup><sub>C-F</sub> = 9.5 Hz), 135.6 (d, 1C, *J*<sup>3</sup><sub>C-F</sub> = 12.0 Hz),  
6 140.3 (d, 1C, *J*<sup>4</sup><sub>C-F</sub> = 2.8 Hz), 149.5 (1C), 150.5 (2C), 159.2 (d, 1C, *J*<sup>1</sup><sub>C-F</sub> = 243 Hz),  
7 191.8 (1C); <sup>19</sup>F NMR (CDCl<sub>3</sub>, 376 MHz) δ –113.4 (ddd, *J* = 5.6, 8.0, 10.8 Hz); IR (KBr,  
8 cm<sup>-1</sup>) 733, 760, 937, 1229, 1449, 1517, 1599, 2826, 3206; HRMS (ESI<sup>+</sup>) *m/z* 338.10981  
9 ([M+Na]<sup>+</sup>, C<sub>17</sub>H<sub>18</sub>FN<sub>3</sub>NaS<sup>+</sup> requires 338.10977).

10

11 ***N*-[5-Fluoro-2-(1-piperidinyl)phenyl]isonicotinamide (FIA-348)**

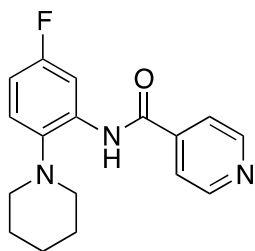

12

13 Mp 115–116 °C; TLC *R*<sub>f</sub> 0.40 (*n*-hexane/ethyl acetate = 1/1); <sup>1</sup>H NMR (CDCl<sub>3</sub>, 400  
14 MHz) δ 1.62–1.69 (m, 2H, CH<sub>2</sub>), 1.70–1.78 (br, 4H, 2CH<sub>2</sub>), 2.75–2.83 (br, 4H, 2CH<sub>2</sub>),  
15 6.81 (ddd, 1H, *J* = 2.8, 8.8, 10.8 Hz, aromatic), 7.18 (dd, 1H, *J* = 5.6, 8.8 Hz, aromatic),  
16 7.71–7.74 (AA'BB', 2H, aromatic), 8.34 (dd, 1H, *J* = 2.8, 10.8 Hz, aromatic), 9.14–9.17

1 (AA'BB', 2H, aromatic), 9.83 (s, 1H, NH);  $^{13}\text{C}$  NMR ( $\text{CDCl}_3$ , 126 MHz)  $\delta$  23.8 (1C),  
 2 27.2 (2C), 54.2 (2C), 106.7 (d, 1C,  $J^2_{\text{C-F}} = 29.0$  Hz), 110.5 (d, 1C,  $J^2_{\text{C-F}} = 22.7$  Hz),  
 3 120.7 (2C), 122.0 (d, 1C,  $J^3_{\text{C-F}} = 8.8$  Hz), 134.3 (d, 1C,  $J^3_{\text{C-F}} = 12.6$  Hz), 138.6 (d, 1C,  
 4  $J^4_{\text{C-F}} = 2.5$  Hz), 141.8 (1C), 150.9 (2C), 160.0 (d, 1C,  $J^1_{\text{C-F}} = 243$  Hz), 162.7 (1C);  $^{19}\text{F}$   
 5 NMR ( $\text{CDCl}_3$ , 376 MHz)  $\delta$  -114.5 (ddd,  $J = 5.6, 10.8, 10.8$  Hz); IR (KBr,  $\text{cm}^{-1}$ ) 681,  
 6 1159, 1265, 1495, 1524, 1605, 1682, 2936, 3306; HRMS ( $\text{ESI}^+$ )  $m/z$  322.13150  
 7 ( $[\text{M}+\text{Na}]^+$ ,  $\text{C}_{17}\text{H}_{18}\text{FN}_3\text{NaO}^+$  requires 322.13261).

8

9 ***N*-[5-Fluoro-2-(1-hexahydro-1*H*-azepinyl)phenyl]isonicotinamide (FIA-002)**

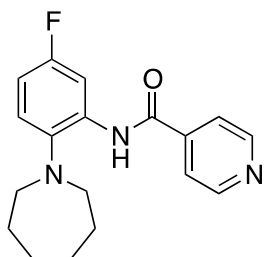

10

11 Mp 135–136 °C; TLC  $R_f$  0.50 (*n*-hexane/ethyl acetate = 1/2);  $^1\text{H}$  NMR ( $\text{CDCl}_3$ , 400  
 12 MHz)  $\delta$  1.61–1.82 (br, 8H, 4CH<sub>2</sub>), 2.97–3.07 (br, 4H, 2CH<sub>2</sub>), 6.80 (ddd, 1H,  $J = 2.0, 8.1,$   
 13 8.1 Hz, aromatic), 7.19 (dd, 1H,  $J = 5.8, 8.1$  Hz, aromatic), 7.74–7.77 (AA'BB', 2H,  
 14 aromatic), 8.33 (dd, 1H,  $J = 2.0, 10.4$  Hz, aromatic), 8.82–8.85 (AA'BB', 2H, aromatic),  
 15 9.93 (s, 1H, NH);  $^{13}\text{C}$  NMR ( $\text{CDCl}_3$ , 126 MHz)  $\delta$  27.1 (2C), 30.1 (2C), 57.7 (2C), 106.8  
 16 (d, 1C,  $J^2_{\text{C-F}} = 29.0$  Hz), 111.1 (d, 1C,  $J^2_{\text{C-F}} = 22.7$  Hz), 121.0 (2C), 124.0 (d, 1C,  $J^3_{\text{C-F}}$

1 = 10.0 Hz), 134.6 (d, 1C,  $J^3_{\text{C-F}} = 11.3$  Hz), 141.2 (d, 1C,  $J^4_{\text{C-F}} = 2.5$  Hz), 142.2 (1C),  
2 151.1 (2C), 160.2 (d, 1C,  $J^1_{\text{C-F}} = 242$  Hz), 163.1 (1C);  $^{19}\text{F}$  NMR ( $\text{CDCl}_3$ , 376 MHz)  $\delta$  –  
3 114.5 (ddd,  $J = 5.8, 8.1, 10.4$  Hz); IR (KBr,  $\text{cm}^{-1}$ ) 681, 872, 1244, 1271, 1444, 1520,  
4 1603, 1682, 2853, 2926, 3300; HRMS ( $\text{ESI}^+$ )  $m/z$  336.14815 ( $[\text{M}+\text{Na}]^+$ ,  
5  $\text{C}_{18}\text{H}_{20}\text{FN}_3\text{NaO}^+$  requires 336.14826).

6  
7 ***N*-[5-Fluoro-2-(1-hexahydro-1*H*-azepinyl)phenyl]isonicotinthioamide (FIT-047)**

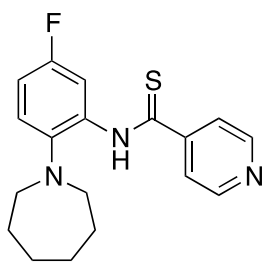

8  
9 Mp 131–133 °C; TLC  $R_f$  0.46 (*n*-hexane/dichloromethane/ethyl acetate = 2/5/3);  $^1\text{H}$   
10 NMR ( $\text{CDCl}_3$ , 400 MHz)  $\delta$  1.64–1.75 (m, 8H, 4CH<sub>2</sub>), 2.99–3.04 (m, 4H, 2CH<sub>2</sub>), 6.94  
11 (ddd, 1H,  $J = 2.9, 8.7, 8.7$  Hz, aromatic), 7.25 (dd, 1H,  $J = 5.5, 8.7$  Hz, aromatic), 7.69–  
12 7.74 (AA'BB', 2H, aromatic), 8.73–8.78 (AA'BB', 2H, aromatic), 9.27 (dd, 1H,  $J = 2.9,$   
13 10.8 Hz, aromatic), 11.2 (s, 1H, NH);  $^{13}\text{C}$  NMR ( $\text{CDCl}_3$ , 126 MHz)  $\delta$  26.8 (2C), 29.9  
14 (2C), 57.7 (2C), 106.8 (d, 1C,  $J^2_{\text{C-F}} = 29.0$  Hz), 113.1 (d, 1C,  $J^2_{\text{C-F}} = 22.7$  Hz), 120.5  
15 (2C), 124.0 (d, 1C,  $J^3_{\text{C-F}} = 10.0$  Hz), 135.8 (d, 1C,  $J^3_{\text{C-F}} = 12.6$  Hz), 142.7 (d, 1C,  $J^4_{\text{C-F}}$   
16 = 2.5 Hz), 150.0 (1C), 150.7 (2C), 159.2 (d, 1C,  $J^1_{\text{C-F}} = 243$  Hz), 192.1 (1C);  $^{19}\text{F}$  NMR

1 (CDCl<sub>3</sub>, 376 MHz)  $\delta$  -113.5 (ddd,  $J$  = 5.5, 8.7, 10.8 Hz); IR (KBr, cm<sup>-1</sup>) 731, 812, 1155,  
2 1364, 1354, 1447, 1514, 1597, 2926, 3175; HRMS (ESI<sup>+</sup>)  $m/z$  352.12365 ([M+Na]<sup>+</sup>,  
3 C<sub>18</sub>H<sub>20</sub>FN<sub>3</sub>NaS<sup>+</sup> requires 352.12542).

4

5 ***N*-[5-Fluoro-2-(1-indolinyl)phenyl]isonicotinamide (FIA-017)**

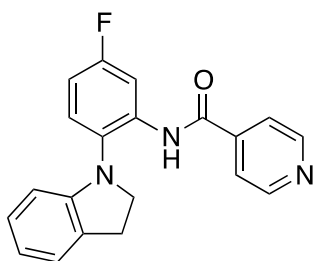

6  
7 Mp 150–151 °C; TLC  $R_f$  0.28 (*n*-hexane/ethyl acetate = 1/1); <sup>1</sup>H NMR (CDCl<sub>3</sub>, 500  
8 MHz)  $\delta$  3.18–3.24 (m, 2H, CH<sub>2</sub>), 3.57–3.68 (br, 1H, CH<sub>2</sub>), 3.78–3.88 (br, 1H, CH<sub>2</sub>),  
9 6.30 (d, 1H,  $J$  = 7.5 Hz, aromatic), 6.87 (dd, 1H,  $J$  = 7.5, 7.5 Hz, aromatic), 6.91 (ddd,  
10 1H,  $J$  = 1.0, 8.0, 8.0 Hz, aromatic), 7.06 (dd, 1H,  $J$  = 7.5, 7.5 Hz, aromatic), 7.26–7.29  
11 (m, 2H, aromatic), 7.51–7.54 (AA'BB', 2H, aromatic), 8.46 (dd, 1H,  $J$  = 3.0, 10.5 Hz,  
12 aromatic), 8.73–8.75 (AA'BB', 2H, aromatic), 9.04 (br s, 1H, NH); <sup>13</sup>C NMR (CDCl<sub>3</sub>,  
13 126 MHz)  $\delta$  29.1 (1C), 56.1 (1C), 107.7 (d, 1C,  $J^2_{C-F}$  = 29.0 Hz), 109.5 (1C), 111.9 (d,  
14 1C,  $J^2_{C-F}$  = 23.1 Hz), 120.4 (1C), 120.6 (2C), 125.1 (1C), 125.8 (d, 1C,  $J^3_{C-F}$  = 9.6 Hz),  
15 127.6 (1C), 130.5 (1C), 131.2 (d, 1C,  $J^4_{C-F}$  = 2.1 Hz), 136.4 (d, 1C,  $J^3_{C-F}$  = 12.5 Hz),

1 141.5 (1C), 150.5 (1C), 150.9 (2C), 161.0 (d, 1C,  $J_{\text{C-F}}^1 = 246$  Hz), 163.2 (1C);  $^{19}\text{F}$  NMR  
2 ( $\text{CDCl}_3$ , 376 MHz)  $\delta$  -111.8 (ddd,  $J = 6.0, 8.0, 10.5$  Hz); IR (KBr,  $\text{cm}^{-1}$ ) 748, 1258,  
3 1454, 1524, 1605, 1682, 2932, 3348; HRMS ( $\text{ESI}^+$ )  $m/z$  356.11645 ( $[\text{M}+\text{Na}]^+$ ,  
4  $\text{C}_{20}\text{H}_{16}\text{FN}_3\text{NaO}^+$  requires 356.11696).

5

## **Methods**

### **In vitro kinase assay for ATP competitive analysis**

The ATP competitive analysis were assayed in a reaction mixture, containing CDK9/cyclinT1, 8 mM MOPS-NaOH (pH 7.0), 0.2 mM EDTA, 100  $\mu$ M KTFCGTPEYLAPEVRREPRILSEEEQEMFRDFDYIADWC, 10 mM MgAcetate and [ $\gamma$ -33P-ATP]. The reaction is initiated by the addition of the MgATP mix. ATP and FIT-039 concentrations were 1-1000  $\mu$ M and 0.003-30  $\mu$ M, respectively. After incubation for 40 minutes at room temperature, the reaction is stopped by the addition of 3% phosphoric acid solution. 10  $\mu$ L of the reaction is then spotted onto a P30 filtermat and washed three times for 5 minutes in 75 mM phosphoric acid and once in methanol prior to drying and scintillation counting. This assay was commissioned to Millipore.

### **In vitro kinase assay and IC<sub>50</sub> determination**

The assay protocols of each kinase (CDK2/CycA2, CDK2/CycE1, CDK4CycD3, CDK5/p25, CDK6/CycD3, CDK7/CycH/MAT1 and CDK9/CycT1) have been

published on the CarnaBiosciences website  
(<http://www.carnabio.com/english/index.html>). Kinase activities were measured by a  
mobility shift assay(8). Compounds were dissolved in DMSO and diluted in a half-log  
scale for use in IC<sub>50</sub> determinations. The DMSO solution was diluted in assay buffer to  
yield a final concentration of 1% DMSO for each compound. Kinase assays were  
performed using ATP at concentrations of the *K<sub>m</sub>* values for each kinase. The inhibition  
of kinase activity by each compound was calculated as follows: inhibition (%) = [1-(A-  
B)/(C-B)) × 100, where A is the response with the compound, B is the background  
response with kinase, and C is the response with vehicle (1% DMSO). The IC<sub>50</sub> value of  
each compound was calculated by interpolation on a log-concentration-response curve  
fitted with a four-parameter logistic equation. The pIC<sub>50</sub> values were given as -log<sub>10</sub>  
(IC<sub>50</sub>) values(9).

#### **Large panel of kinase screening**

Kinase inhibitory activity of FIT-039 (10 μM) against kinome were screened by Merck  
Millipore's KinaseProfiler service (Merck Millipore) and Profiling Services

(Carnabiosciences). These assay protocols of each service have been published on the Merck Millipore website (<http://www.millipore.com/techpublications/tech1/pf3036>) and the Carnabiosciences website (<http://www.carnabio.com/english/index.html>), respectively.

#### **Influenza H1N1 infectious assay**

MDCK cells were infected with influenza H1N1 (PR8 strain) with chemical compounds. Influenza H1N1-infected cells were incubated for 48 hr, following which total RNA was extracted using Sepasol RNA-I Super (NACALAI TESQUE, INC.). Reverse transcription was performed with PrimeScript Reverse Transcriptase (Takara Bio, Inc.), using random primer. Influenza H1N1 and cellular GAPDH were quantitative by real-time PCR. Analyses were performed using FastStart Universal Probe Master (ROX) (Roche Applied Science). PCR was performed with an initial denaturation reaction at 95 °C for 1 min, and then amplified with 40 cycles of 95 °C for 30 sec, 60 °C for 30 sec, 72 °C for 30 sec. The amplification was monitored on Step One Plus (Applied Biosystems, Inc.). The primers used are shown in Supplementary Table 6.

1

## 2 **HIV-TAT promoter assay**

3 LTR-Luc consists of the long terminal repeat (LTR; 8454nt-(9000nt)-20nt) from HIV-1

4 clone NL43 (U26942) cloned into pGL3-basic (Promega). pCMV4-tat consist of the tat

5 cDNA (5208-5422 jointed to 7747-7792) from HIV-1 clone NL43 cloned into insert to

6 pCMV4(10).

7 CV1 cells were plated  $2 \times 10^5$  cells / 6 cm dish and co-transfected with 0.5

8  $\mu$ g of hRL-tk, 1 $\mu$ g LTR-Luc, 0.5 $\mu$ g EGFP-C1, 5 $\mu$ g herring sperm DNA and 3 $\mu$ g

9 CMV4-Tat or CMV4-(no insert) by calcium phosphate transfection method. hRL-tk

10 (Promega) as an internal control. Medium was changed to each compound medium 24

11 hr after transfection. These cells were harvested 48 hr post-treatment by passive lysis

12 buffer. Luciferase and renilla luciferase activity were measured by Luciferase Assay

13 System (Promega).

14

## 15 **Skin irritation test**

16 The rabbit skin irritation test was performed at Drug Safety Testing Center Co., Ltd.

The backs of rabbits were clipped and epidermal abrasions were performed with a sterile needle at one test site, while the opposite site remained intact. A total of 0.5 g of FIT-039 was then applied to each site, which was then covered with a non-reactive cloth. Three rabbits were assigned to each experimental group. The test sites were examined for dermal reactions 27 and 72 hours after the test article application in accordance with the FHSA-recommended Draize scoring criteria(11). The Primary Irritation Index (P.I.I.) of FIT-039 was calculated.

#### **Ames test**

The Ames test was performed at Hatano Research Institute, Food and Drug Safety Center. Bacterium Salmonella strains (TA100, TA1535, TA98, and TA1537) and Escherichia coli strain (WP2 uvrA) were pre-incubated with FIT-039 or 4 positive control compounds (AF2: 2-(2-furyl)-3-(5-nitro-2-furyl)acrylamide, SA: sodium azide, 9AA: 9-aminoacridine, and 2AA: 2-aminoanthracene), with or without rat liver extract (S9mix), which was used to examine the effect of the metabolized compounds. These mixtures were spread on agar plates and incubated for 48 hours. The colonies were

counted and mutagenicity was judged.

### **Micronucleus test**

The micronucleus test was performed at New Drug Development Research Center, Inc. FIT-039 (500 or 2000 mg/kg) or the solvent (polyethyleneglycol #400) were orally administrated to male CD1 mice once a day for 2 days. Six mice were assigned to each experimental group. Their bone marrow cells were collected at the femur 24 hours after the final administration, and the emergence of micronucleated polychromatic erythrocytes (MNPCE) and ratio of polychromatic erythrocytes in erythrocytes (PCE%) were examined.

### **Four-week repeat-dose oral toxicity study in rats and dogs**

These studies were performed at Biototech Co., Ltd.. Male SD rat (4 weeks old) and male beagle dogs (6 months old) were purchased from CHARLES RIVER LABORATORIES JAPAN, Inc and BEIJING MARSHALL BIOTECHNOLOGY Co., Ltd., China, respectively. FIT-039 (16.7, 50 or 150 mg/kg) or the solvent (0.5%

1 methylcellulose) was orally administrated to these animals once a day for 28 days. Ten  
2 rats were assigned to each experimental group. Body weights and general conditions  
3 were determined for 28 days from the first administration.

#### 5 **Oral absorbability study in rat**

6 These studies were performed at Biototech Co., Ltd.. Male SD rat (4 weeks old) were  
7 purchased from CHARLES RIVER LABORATORIES JAPAN, Inc. FIT-039 (16.7, 50  
8 or 150 mg/kg) or the solvent (0.5% methylcellulose) was orally administrated to these  
9 animals. Three rat were assigned to each experimental group. Venous blood samples  
10 were collected at 0, 0.5, 1, 2, 4, 6, 8 and 24 hrs from the first administration. These  
11 blood samples were deproteinized, and then measured by LC/MS/MS (Prominence;  
12 SHIMADZU Co., Ltd, API4000; AB Sciex, Pte. Ltd.).

## SUPPLEMENTARY REFERENCE

1. Hoeflich, K.P., Luo, J., Rubie, E.A., Tsao, M.S., Jin, O., and Woodgett, J.R. 2000. Requirement for glycogen synthase kinase-3 $\beta$  in cell survival and NF- $\kappa$ B activation. *Nature* 406:86-90.
2. Yasui, T., Sakakibara-Yada, K., Nishimura, T., Morita, K., Tada, S., Mosialos, G., Kieff, E., and Kikutani, H. 2012. Protein kinase N1, a cell inhibitor of Akt kinase, has a central role in quality control of germinal center formation. *Proc Natl Acad Sci U S A* 109:21022-21027.
3. Shima, H., Pende, M., Chen, Y., Fumagalli, S., Thomas, G., and Kozma, S.C. 1998. Disruption of the p70(s6k)/p85(s6k) gene reveals a small mouse phenotype and a new functional S6 kinase. *EMBO J* 17:6649-6659.
4. Leder, S., Czajkowska, H., Maenz, B., De Graaf, K., Barthel, A., Joost, H.G., and Becker, W. 2003. Alternative splicing variants of dual specificity tyrosine phosphorylated and regulated kinase 1B exhibit distinct patterns of expression and functional properties. *Biochem J* 372:881-888.
5. MacAulay, K., Doble, B.W., Patel, S., Hansotia, T., Sinclair, E.M., Drucker, D.J., Nagy, A., and Woodgett, J.R. 2007. Glycogen synthase kinase 3 $\alpha$ -specific regulation of murine hepatic glycogen metabolism. *Cell Metab* 6:329-337.
6. Kitamura, T., Kido, Y., Nef, S., Merenmies, J., Parada, L.F., and Accili, D. 2001. Preserved pancreatic beta-cell development and function in mice lacking the insulin receptor-related receptor. *Mol Cell Biol* 21:5624-5630.
7. Bogacheva, O., Bogachev, O., Menon, M., Dev, A., Houde, E., Valoret, E.I., Prosser, H.M., Creasy, C.L., Pickering, S.J., Grau, E., et al. 2008. DYRK3 dual-specificity kinase attenuates erythropoiesis during anemia. *J Biol Chem* 283:36665-36675.
8. Kinoshita, T., Miyano, N., Nakai, R., Yokota, K., Ishiguro, H., and Tada, T. 2008. Protein purification and preliminary crystallographic

analysis of human Lyn tyrosine kinase. *Protein Expr Purif* 58:318-324.

9. Kitagawa, D., Yokota, K., Gouda, M., Narumi, Y., Ohmoto, H., Nishiwaki, E., Akita, K., and Kirii, Y. 2013. Activity-based kinase profiling of approved tyrosine kinase inhibitors. *Genes Cells* 18:110-122.

10. Nishimura, A., Ono, T., Ishimoto, A., Dowhanick, J.J., Frizzell, M.A., Howley, P.M., and Sakai, H. 2000. Mechanisms of human papillomavirus E2-mediated repression of viral oncogene expression and cervical cancer cell growth inhibition. *J Virol* 74:3752-3760.

11. Gilman, M.R., Evans, R.A., and Desalva, S.J. 1978. Influence of Concentration, Exposure Duration, and Patch Occlusivity Upon Rabbit Primary Dermal Irritation Indexes. *Drug Chem Toxicol* 1:391-400.
